# Supplementary material
Source: PubMed Central journal article supplement (PMC2809146)
Supplement: mmc1.pdf [file mmc1.pdf]

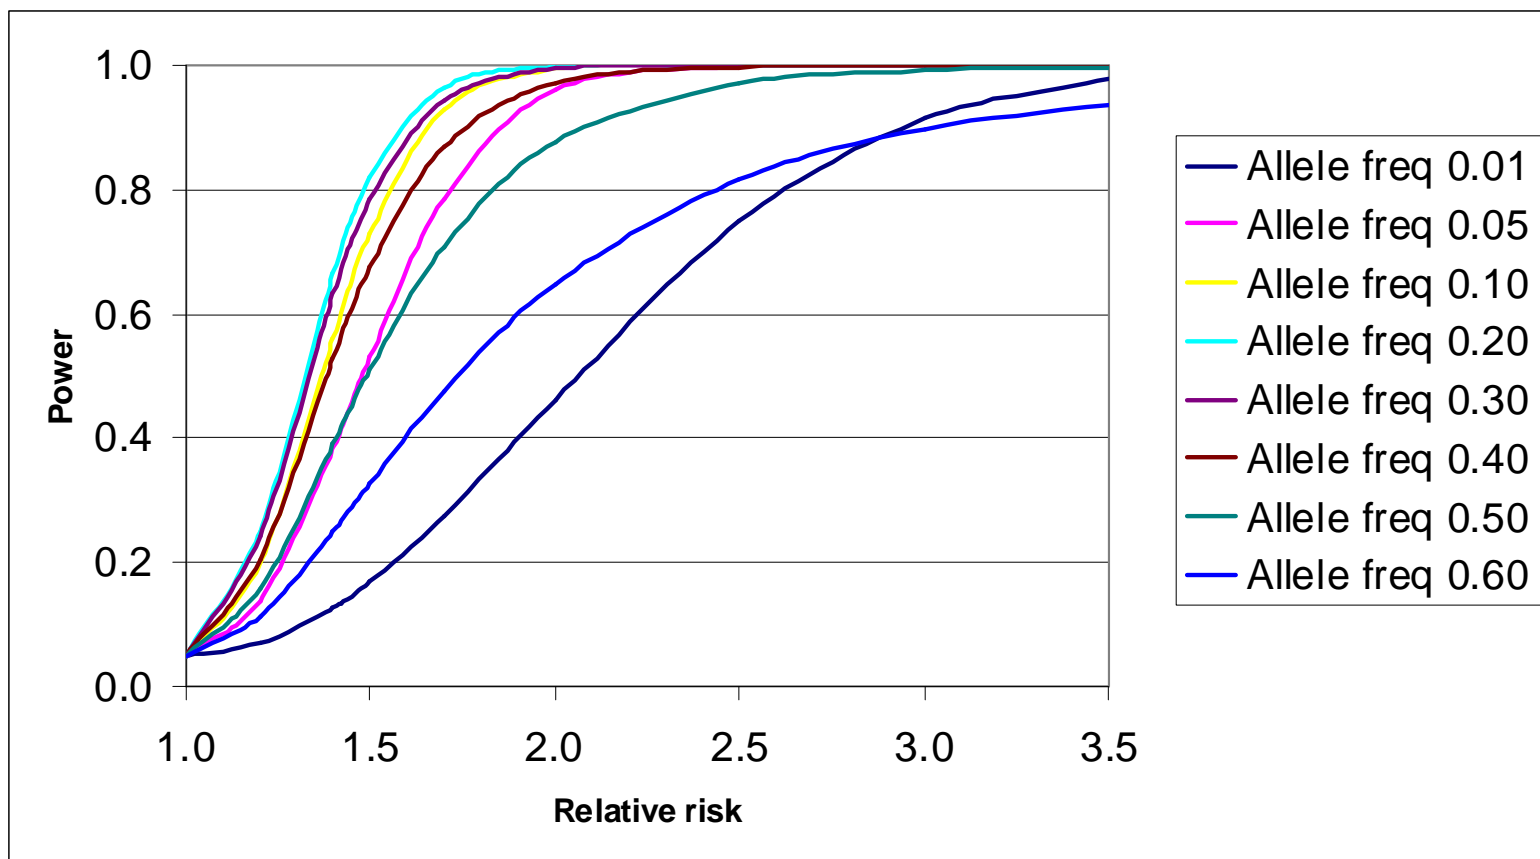

**Supplement 1.** Power calculations for the Health 2000 anxiety disorder study sample (321 cases and 653 controls). Calculations were carried out with 5% disease prevalence, a dominant inheritance model, and equal frequencies of disease and marker alleles ( $D' = 1$ ) using Genetic Power calculator software (<http://pngu.mgh.harvard.edu/~purcell/gpc>).
