# Supplementary material
Source: PubMed Central journal article supplement (PMC2809146)
Supplement: mmc2.pdf [file mmc2.pdf]

| Gene       | SNP rs #             | SNP type                              | Alleles [A1/A2]   | Group             | ANX core       |                |                     | ANX extended   |                |                     | PD             |                |                     | GAD core       |                |                     | GAD extended   |                |                     | SOCPH core     |                |                     | SOCPH extended |                |                     |
|------------|----------------------|---------------------------------------|-------------------|-------------------|----------------|----------------|---------------------|----------------|----------------|---------------------|----------------|----------------|---------------------|----------------|----------------|---------------------|----------------|----------------|---------------------|----------------|----------------|---------------------|----------------|----------------|---------------------|
|            |                      |                                       |                   |                   | Allele freq    |                | Allelic LRT p-value |
|            |                      |                                       |                   |                   | A1             | A2             |                     | A1             | A2             |                     | A1             | A2             |                     | A1             | A2             |                     | A1             | A2             |                     | A1             | A2             |                     | A1             | A2             |                     |
| ALAD       | rs16933168           | tag SNP                               | G/A               | Cases<br>Controls | 0.095<br>0.080 | 0.905<br>0.920 | 0.361               | 0.097<br>0.081 | 0.903<br>0.919 | 0.322               | 0.095<br>0.078 | 0.905<br>0.923 | 0.489               | 0.087<br>0.071 | 0.913<br>0.929 | 0.595               | 0.097<br>0.078 | 0.903<br>0.922 | 0.503               | 0.048<br>0.082 | 0.952<br>0.918 | 0.303               | 0.044<br>0.086 | 0.956<br>0.914 | 0.171               |
|            | rs818702             | tag SNP                               | G/A               | Cases<br>Controls | 0.187<br>0.194 | 0.813<br>0.806 | 0.739               | 0.196<br>0.196 | 0.804<br>0.804 | 0.998               | 0.165<br>0.189 | 0.835<br>0.811 | 0.466               | 0.171<br>0.206 | 0.829<br>0.795 | 0.379               | 0.181<br>0.218 | 0.819<br>0.782 | 0.271               | 0.116<br>0.239 | 0.884<br>0.761 | <b>0.008</b>        | 0.119<br>0.225 | 0.881<br>0.775 | 0.013               |
|            | rs11789221           | polymorphic miR target site           | T/C               | Cases<br>Controls | 0.004<br>0.006 | 0.997<br>0.994 | 0.517               | 0.005<br>0.006 | 0.995<br>0.994 | 0.720               | 0.005<br>0.009 | 0.995<br>0.991 | 0.589               | 0.000<br>0.007 | 1.000<br>0.993 | 0.346               | 0.000<br>0.007 | 1.000<br>0.993 | 0.173               | 0.000<br>0.013 | 1.000<br>0.987 | 0.177               | 0.000<br>0.011 | 1.000<br>0.989 | 0.180               |
|            | rs8177822            | polymorphic miR target site           | A/C               | Cases<br>Controls | 0.018<br>0.004 | 0.982<br>0.996 | 0.012               | 0.017<br>0.005 | 0.983<br>0.995 | 0.017               | 0.014<br>0.007 | 0.986<br>0.993 | 0.451               | 0.000<br>0.000 | 1.000<br>1.000 | 0.163               | 0.005<br>0.002 | 0.995<br>0.998 | 0.735               | 0.034<br>0.004 | 0.966<br>0.986 | 0.038               | 0.038<br>0.008 | 0.962<br>0.992 | 0.056               |
|            | rs818708             | tag SNP / polymorphic miR target site | C/T               | Cases<br>Controls | 0.595<br>0.613 | 0.405<br>0.387 | 0.446               | 0.601<br>0.621 | 0.399<br>0.379 | 0.381               | 0.612<br>0.625 | 0.388<br>0.375 | 0.739               | 0.582<br>0.625 | 0.418<br>0.375 | 0.375               | 0.588<br>0.623 | 0.412<br>0.378 | 0.415               | 0.614<br>0.657 | 0.386<br>0.343 | 0.440               | 0.602<br>0.652 | 0.392<br>0.349 | 0.334               |
|            | rs8177812            | tag SNP                               | C/T               | Cases<br>Controls | 0.911<br>0.886 | 0.089<br>0.114 | 0.091               | 0.905<br>0.891 | 0.095<br>0.109 | 0.341               | 0.880<br>0.865 | 0.120<br>0.135 | 0.602               | 0.932<br>0.886 | 0.068<br>0.114 | 0.104               | 0.913<br>0.898 | 0.087<br>0.102 | 0.541               | 0.888<br>0.914 | 0.112<br>0.086 | 0.437               | 0.877<br>0.915 | 0.123<br>0.085 | 0.238               |
|            | rs8177806            | tag SNP                               | C/T               | Cases<br>Controls | 0.930<br>0.919 | 0.070<br>0.081 | 0.393               | 0.926<br>0.922 | 0.074<br>0.078 | 0.737               | 0.902<br>0.901 | 0.098<br>0.100 | 0.943               | 0.945<br>0.910 | 0.055<br>0.090 | 0.168               | 0.936<br>0.919 | 0.064<br>0.081 | 0.438               | 0.895<br>0.936 | 0.105<br>0.064 | 0.167               | 0.883<br>0.939 | 0.117<br>0.061 | 0.062               |
|            | rs1805316            | tag SNP                               | C/T               | Cases<br>Controls | 0.153<br>0.149 | 0.847<br>0.851 | 0.845               | 0.147<br>0.148 | 0.853<br>0.852 | 0.957               | 0.159<br>0.145 | 0.841<br>0.855 | 0.636               | 0.171<br>0.141 | 0.829<br>0.859 | 0.413               | 0.155<br>0.137 | 0.845<br>0.863 | 0.533               | 0.155<br>0.162 | 0.845<br>0.838 | 0.869               | 0.146<br>0.160 | 0.854<br>0.840 | 0.708               |
|            | rs1800435            | non-synonymous (K/N)                  | C/G               | Cases<br>Controls | 0.083<br>0.082 | 0.917<br>0.918 | 0.919               | 0.081<br>0.087 | 0.919<br>0.913 | 0.652               | 0.093<br>0.071 | 0.907<br>0.929 | 0.335               | 0.075<br>0.063 | 0.925<br>0.937 | 0.632               | 0.073<br>0.072 | 0.927<br>0.928 | 0.984               | 0.086<br>0.067 | 0.914<br>0.933 | 0.508               | 0.085<br>0.083 | 0.915<br>0.917 | 0.953               |
|            | rs818684             | tag SNP                               | T/C               | Cases<br>Controls | 0.147<br>0.152 | 0.853<br>0.848 | 0.777               | 0.145<br>0.152 | 0.855<br>0.849 | 0.688               | 0.187<br>0.165 | 0.813<br>0.835 | 0.488               | 0.153<br>0.141 | 0.847<br>0.859 | 0.742               | 0.132<br>0.146 | 0.868<br>0.854 | 0.638               | 0.164<br>0.133 | 0.836<br>0.868 | 0.418               | 0.177<br>0.137 | 0.823<br>0.863 | 0.303               |
|            | rs818688             | tag SNP                               | C/G               | Cases<br>Controls | 0.419<br>0.404 | 0.581<br>0.596 | 0.578               | 0.416<br>0.409 | 0.584<br>0.591 | 0.776               | 0.471<br>0.410 | 0.529<br>0.590 | 0.125               | 0.390<br>0.360 | 0.610<br>0.640 | 0.520               | 0.387<br>0.374 | 0.613<br>0.626 | 0.744               | 0.482<br>0.392 | 0.518<br>0.608 | 0.123               | 0.484<br>0.412 | 0.516<br>0.589 | 0.182               |
|            | rs818689             | tag SNP                               | T/C               | Cases<br>Controls | 0.147<br>0.149 | 0.853<br>0.852 | 0.932               | 0.143<br>0.148 | 0.857<br>0.852 | 0.795               | 0.187<br>0.161 | 0.813<br>0.840 | 0.396               | 0.153<br>0.138 | 0.847<br>0.862 | 0.666               | 0.132<br>0.142 | 0.868<br>0.859 | 0.754               | 0.164<br>0.133 | 0.836<br>0.868 | 0.421               | 0.169<br>0.137 | 0.831<br>0.863 | 0.414               |
|            | rs818694             | tag SNP                               | T/A               | Cases<br>Controls | 0.349<br>0.341 | 0.651<br>0.659 | 0.735               | 0.335<br>0.341 | 0.665<br>0.659 | 0.778               | 0.398<br>0.346 | 0.665<br>0.654 | 0.185               | 0.315<br>0.325 | 0.685<br>0.675 | 0.825               | 0.306<br>0.327 | 0.694<br>0.673 | 0.588               | 0.414<br>0.332 | 0.586<br>0.668 | 0.137               | 0.400<br>0.335 | 0.600<br>0.665 | 0.204               |
|            | rs3827674            | tag SNP                               | G/A               | Cases<br>Controls | 0.938<br>0.958 | 0.062<br>0.042 | 0.089               | 0.938<br>0.954 | 0.062<br>0.046 | 0.143               | 0.944<br>0.965 | 0.056<br>0.035 | 0.221               | 0.932<br>0.972 | 0.068<br>0.028 | 0.066               | 0.937<br>0.954 | 0.063<br>0.046 | 0.385               | 0.914<br>0.948 | 0.086<br>0.052 | 0.237               | 0.915<br>0.946 | 0.085<br>0.054 | 0.262               |
|            | rs11083238           | tag SNP                               | T/C               | Cases<br>Controls | 0.488<br>0.500 | 0.512<br>0.500 | 0.632               | 0.478<br>0.504 | 0.522<br>0.496 | 0.291               | 0.528<br>0.473 | 0.472<br>0.528 | 0.193               | 0.514<br>0.493 | 0.486<br>0.507 | 0.681               | 0.476<br>0.493 | 0.524<br>0.507 | 0.701               | 0.422<br>0.521 | 0.578<br>0.479 | 0.086               | 0.439<br>0.523 | 0.562<br>0.477 | 0.120               |
| rs8090315  | tag SNP              | T/C                                   | Cases<br>Controls | 0.628<br>0.650    | 0.372<br>0.350 | 0.372          | 0.630<br>0.653      | 0.370<br>0.347 | 0.319          | 0.637<br>0.655      | 0.363<br>0.345 | 0.651          | 0.644<br>0.634      | 0.356<br>0.366 | 0.837          | 0.637<br>0.651      | 0.363<br>0.350 | 0.762          | 0.643<br>0.660      | 0.357<br>0.341 | 0.764          | 0.651<br>0.654      | 0.349<br>0.346 | 0.955          |                     |
| rs1530380  | tag SNP              | A/G                                   | Cases<br>Controls | 0.591<br>0.555    | 0.409<br>0.445 | 0.175          | 0.591<br>0.560      | 0.410<br>0.440 | 0.213          | 0.589<br>0.571      | 0.411<br>0.429 | 0.673          | 0.575<br>0.521      | 0.425<br>0.480 | 0.286          | 0.598<br>0.546      | 0.402<br>0.454 | 0.239          | 0.591<br>0.560      | 0.409<br>0.440 | 0.593          | 0.573<br>0.553      | 0.427<br>0.447 | 0.720          |                     |
| rs2289664  | non-synonymous (S/N) | T/C                                   | Cases<br>Controls | 0.968<br>0.974    | 0.032<br>0.026 | 0.476          | 0.967<br>0.970      | 0.033<br>0.030 | 0.706          | 0.981<br>0.975      | 0.019<br>0.025 | 0.618          | 0.973<br>0.969      | 0.027<br>0.031 | 0.858          | 0.966<br>0.971      | 0.034<br>0.029 | 0.733          | 0.938<br>0.983      | 0.063<br>0.017 | 0.059          | 0.937<br>0.981      | 0.063<br>0.019 | 0.043          |                     |
| rs4363925  | tag SNP              | G/A                                   | Cases<br>Controls | 0.747<br>0.756    | 0.253<br>0.244 | 0.694          | 0.749<br>0.749      | 0.251<br>0.251 | 1.000          | 0.750<br>0.750      | 0.250<br>0.250 | 0.989          | 0.750<br>0.747      | 0.250<br>0.254 | 0.941          | 0.738<br>0.728      | 0.262<br>0.273 | 0.792          | 0.776<br>0.770      | 0.224<br>0.230 | 0.903          | 0.797<br>0.760      | 0.203<br>0.204 | 0.400          |                     |
| rs10502505 | tag SNP              | T/C                                   | Cases<br>Controls | 0.078<br>0.097    | 0.922<br>0.903 | 0.207          | 0.079<br>0.098      | 0.921<br>0.902 | 0.185          | 0.083<br>0.106      | 0.917<br>0.895 | 0.381          | 0.055<br>0.107      | 0.945<br>0.893 | 0.064          | 0.073<br>0.110      | 0.927<br>0.890 | 0.139          | 0.147<br>0.097      | 0.853<br>0.903 | 0.211          | 0.146<br>0.086      | 0.854<br>0.914 | 0.096          |                     |
| rs1041985  | tag SNP              | C/T                                   | Cases<br>Controls | 0.640<br>0.646    | 0.360<br>0.354 | 0.819          | 0.637<br>0.647      | 0.363<br>0.353 | 0.646          | 0.676<br>0.661      | 0.324<br>0.339 | 0.700          | 0.610<br>0.643      | 0.390<br>0.357 | 0.489          | 0.602<br>0.644      | 0.398<br>0.356 | 0.312          | 0.638<br>0.651      | 0.362<br>0.349 | 0.805          | 0.646<br>0.647      | 0.354<br>0.353 | 0.987          |                     |
| rs7240351  | tag SNP              | G/A                                   | Cases<br>Controls | 0.549<br>0.551    | 0.451<br>0.449 | 0.963          | 0.556<br>0.550      | 0.444<br>0.450 | 0.805          | 0.505<br>0.544      | 0.495<br>0.456 | 0.375          | 0.537<br>0.573      | 0.463<br>0.427 | 0.485          | 0.568<br>0.567      | 0.432<br>0.433 | 0.993          | 0.676<br>0.519      | 0.324<br>0.481 | <b>0.008</b>   | 0.667<br>0.513      | 0.333<br>0.488 | <b>0.006</b>   |                     |
| rs8092870  | tag SNP              | T/C                                   | Cases<br>Controls | 0.424<br>0.430    | 0.576<br>0.570 | 0.808          | 0.425<br>0.430      | 0.575<br>0.571 | 0.846          | 0.458<br>0.426      | 0.543<br>0.574 | 0.470          | 0.451<br>0.412      | 0.549<br>0.588 | 0.416          | 0.425<br>0.418      | 0.575<br>0.583 | 0.853          | 0.362<br>0.430      | 0.638<br>0.570 | 0.210          | 0.369<br>0.441      | 0.631<br>0.559 | 0.164          |                     |
| rs1941182  | tag SNP              | C/A                                   | Cases<br>Controls | 0.583<br>0.574    | 0.417<br>0.426 | 0.731          | 0.581<br>0.576      | 0.419<br>0.424 | 0.851          | 0.519<br>0.595      | 0.481<br>0.406 | 0.077          | 0.582<br>0.589      | 0.418<br>0.411 | 0.882          | 0.598<br>0.590      | 0.402<br>0.410 | 0.847          | 0.643<br>0.564      | 0.357<br>0.436 | 0.163          | 0.635<br>0.557      | 0.365<br>0.443 | 0.143          |                     |
| rs11564295 | tag SNP              | T/C                                   | Cases<br>Controls | 0.752<br>0.762    | 0.248<br>0.238 | 0.644          | 0.757<br>0.759      | 0.243<br>0.241 | 0.927          | 0.808<br>0.775      | 0.192<br>0.225 | 0.335          | 0.699<br>0.771      | 0.301<br>0.230 | 0.088          | 0.718<br>0.769      | 0.282<br>0.231 | 0.150          | 0.737<br>0.769      | 0.263<br>0.231 | 0.495          | 0.734<br>0.759      | 0.266<br>0.241 | 0.572          |                     |
| rs9646566  | tag SNP              | T/A                                   | Cases<br>Controls | 0.038<br>0.035    | 0.962<br>0.965 | 0.685          | 0.034<br>0.032      | 0.966<br>0.968 | 0.838          | 0.048<br>0.031      | 0.952<br>0.969 | 0.321          | 0.014<br>0.046      | 0.986<br>0.954 | 0.076          | 0.010<br>0.037      | 0.990<br>0.963 | 0.034          | 0.027<br>0.032      | 0.973<br>0.969 | 0.808          | 0.024<br>0.028      | 0.976<br>0.972 | 0.810          |                     |
| rs623234   | tag SNP              | A/G                                   | Cases<br>Controls | 0.489<br>0.481    | 0.511<br>0.519 | 0.769          | 0.484<br>0.483      | 0.516<br>0.517 | 0.980          | 0.443<br>0.486      | 0.557<br>0.514 | 0.329          | 0.514<br>0.500      | 0.486<br>0.500 | 0.789          | 0.529<br>0.483      | 0.471<br>0.517 | 0.250          | 0.561<br>0.456      | 0.439<br>0.544 | 0.069          | 0.547<br>0.457      | 0.453<br>0.543 | 0.099          |                     |
| rs10502507 | tag SNP              | T/A                                   | Cases<br>Controls | 0.113<br>0.127    | 0.887<br>0.873 | 0.397          | 0.113<br>0.126      | 0.887<br>0.874 | 0.419          | 0.126<br>0.142      | 0.874<br>0.858 | 0.593          | 0.097<br>0.130      | 0.903<br>0.871 | 0.313          | 0.114<br>0.127      | 0.886<br>0.873 | 0.650          | 0.158<br>0.137      | 0.842<br>0.863 | 0.621          | 0.148<br>0.127      | 0.852<br>0.873 | 0.588          |                     |
| rs1860642  | tag SNP              | G/T                                   | Cases<br>Controls | 0.186<br>0.194    | 0.814<br>0.807 | 0.725          | 0.185<br>0.199      | 0.815<br>0.801 | 0.464          | 0.176<br>0.175      | 0.824<br>0.825 | 0.986          | 0.217<br>0.218      | 0.783<br>0.782 | 0.988          | 0.184<br>0.214      | 0.816<br>0.786 | 0.403          | 0.193<br>0.164      | 0.807<br>0.836 | 0.498          | 0.214<br>0.173      | 0.786<br>0.827 | 0.342          |                     |
| rs12458418 | tag SNP              | G/A                                   | Cases<br>Controls | 0.157<br>0.152    | 0.843<br>0.848 | 0.814          | 0.157<br>0.156      | 0.843<br>0.844 | 0.974          | 0.154<br>0.142      | 0.846<br>0.858 | 0.694          | 0.164<br>0.185      | 0.836<br>0.815 | 0.587          | 0.151<br>0.177      | 0.850<br>0.823 | 0.392          | 0.147<br>0.126      | 0.853<br>0.874 | 0.601          | 0.172<br>0.128      | 0.828<br>0.827 | 0.248          |                     |
| rs2535597  | tag SNP              | C/T                                   | Cases<br>Controls | 0.798<br>0.811    | 0.202<br>0.189 | 0.521          | 0.795<br>0.810      | 0.205<br>0.190 | 0.421          | 0.792<br>0.787      | 0.208<br>0.213 | 0.874          | 0.815<br>0.792      | 0.185<br>0.208 | 0.575          | 0.786<br>0.779      | 0.214<br>0.221 | 0.849          | 0.793<br>0.805      | 0.207<br>0.195 | 0.795          | 0.808<br>0.811      | 0.192<br>0.189 | 0.946          |                     |
| rs11564299 | tag SNP              | G/A                                   | Cases<br>Controls | 0.200<br>0.196    | 0.800<br>0.804 | 0.866          | 0.203<br>0.202      | 0.798<br>0.798 | 0.975          | 0.175<br>0.187      | 0.826<br>0.813 | 0.714          | 0.222<br>0.205      | 0.778<br>0.795 | 0.67           |                     |                |                |                     |                |                |                     |                |                |                     |

| Gene     | SNP rs #   | SNP type             | Alleles [A1/A2] | Group    | ANX core    |       |                     | ANX extended |       |                     | PD          |       |                     | GAD core    |       |                     | GAD extended |       |                     | SOCPH core  |       |                     | SOCPH extended |       |                     |
|----------|------------|----------------------|-----------------|----------|-------------|-------|---------------------|--------------|-------|---------------------|-------------|-------|---------------------|-------------|-------|---------------------|--------------|-------|---------------------|-------------|-------|---------------------|----------------|-------|---------------------|
|          |            |                      |                 |          | Allele freq |       | Allelic LRT p-value | Allele freq  |       | Allelic LRT p-value | Allele freq |       | Allelic LRT p-value | Allele freq |       | Allelic LRT p-value | Allele freq  |       | Allelic LRT p-value | Allele freq |       | Allelic LRT p-value | Allele freq    |       | Allelic LRT p-value |
|          |            |                      |                 |          | A1          | A2    |                     | A1           | A2    |                     | A1          | A2    |                     | A1          | A2    |                     | A1           | A2    |                     | A1          | A2    |                     | A1             | A2    |                     |
| CPSF4    | rs940336   | tag SNP              | C/T             | Cases    | 0.987       | 0.013 | 0.382               | 0.987        | 0.013 | 0.350               | 0.991       | 0.009 | 0.297               | 0.986       | 0.014 | 0.953               | 0.985        | 0.015 | 0.963               | 1.000       | 0.000 | 0.522               | 0.992          | 0.008 | 0.953               |
|          |            |                      |                 | Controls | 0.982       | 0.018 |                     | 0.982        | 0.019 |                     | 0.979       | 0.021 |                     | 0.986       | 0.014 |                     | 0.985        | 0.015 |                     | 0.996       | 0.004 |                     | 0.992          | 0.008 |                     |
|          | rs10215854 | tag SNP              | A/G             | Cases    | 0.152       | 0.848 | 0.667               | 0.155        | 0.845 | 0.782               | 0.146       | 0.854 | 0.957               | 0.185       | 0.815 | 0.915               | 0.180        | 0.820 | 0.986               | 0.138       | 0.862 | 0.289               | 0.146          | 0.854 | 0.264               |
|          |            |                      |                 | Controls | 0.160       | 0.840 |                     | 0.160        | 0.840 |                     | 0.148       | 0.852 |                     | 0.189       | 0.811 |                     | 0.180        | 0.820 |                     | 0.182       | 0.818 |                     | 0.189          | 0.811 |                     |
|          | rs1043466  | tag SNP              | G/T             | Cases    | 0.246       | 0.754 | 0.754               | 0.246        | 0.754 | 0.742               | 0.248       | 0.752 | 0.405               | 0.268       | 0.732 | 0.758               | 0.253        | 0.748 | 0.977               | 0.224       | 0.776 | 0.506               | 0.239          | 0.762 | 0.598               |
|          |            |                      | Controls        | 0.240    | 0.761       |       | 0.239               | 0.761        |       | 0.219               | 0.781       |       | 0.253               | 0.747       |       | 0.254               | 0.746        |       | 0.256               | 0.744       |       | 0.263               | 0.737          |       |                     |
|          | rs2293256  | tag SNP              | T/C             | Cases    | 0.077       | 0.924 | 0.289               | 0.073        | 0.927 | 0.335               | 0.083       | 0.917 | 0.168               | 0.062       | 0.938 | 0.684               | 0.053        | 0.947 | 0.792               | 0.086       | 0.914 | 0.642               | 0.085          | 0.915 | 0.557               |
|          |            |                      | Controls        | 0.063    | 0.937       |       | 0.062               | 0.938        |       | 0.055               | 0.945       |       | 0.052               | 0.948       |       | 0.059               | 0.942        |       | 0.071               | 0.929       |       | 0.068               | 0.932          |       |                     |
|          | rs7225351  | tag SNP              | A/G             | Cases    | 0.674       | 0.326 | 0.893               | 0.659        | 0.341 | 0.543               | 0.696       | 0.304 | 0.299               | 0.637       | 0.363 | 0.348               | 0.592        | 0.408 | 0.067               | 0.664       | 0.336 | 0.852               | 0.662          | 0.339 | 0.801               |
|          |            |                      | Controls        | 0.678    | 0.322       |       | 0.673               | 0.327        |       | 0.655               | 0.345       |       | 0.682               | 0.318       |       | 0.668               | 0.333        |       | 0.674               | 0.326       |       | 0.674               | 0.326          |       |                     |
|          | rs11079337 | tag SNP              | A/C             | Cases    | 0.675       | 0.325 | 0.841               | 0.660        | 0.340 | 0.495               | 0.692       | 0.308 | 0.369               | 0.646       | 0.354 | 0.413               | 0.598        | 0.402 | 0.077               | 0.664       | 0.336 | 0.811               | 0.662          | 0.339 | 0.758               |
|          |            |                      | Controls        | 0.680    | 0.320       |       | 0.675               | 0.325        |       | 0.656               | 0.348       |       | 0.685               | 0.315       |       | 0.671               | 0.329        |       | 0.677               | 0.323       |       | 0.677               | 0.323          |       |                     |
| DYNLL2   | rs10132    | tag SNP              | A/G             | Cases    | 0.799       | 0.202 | 0.938               | 0.797        | 0.204 | 0.898               | 0.816       | 0.185 | 0.586               | 0.774       | 0.226 | 0.845               | 0.752        | 0.248 | 0.480               | 0.777       | 0.223 | 0.185               | 0.778          | 0.222 | 0.260               |
|          |            |                      |                 | Controls | 0.800       | 0.200 |                     | 0.799        | 0.201 |                     | 0.796       | 0.204 |                     | 0.766       | 0.234 |                     | 0.776        | 0.224 |                     | 0.833       | 0.167 |                     | 0.824          | 0.176 |                     |
|          | rs9900038  | tag SNP              | A/G             | Cases    | 0.196       | 0.804 | 0.711               | 0.199        | 0.801 | 0.696               | 0.178       | 0.822 | 0.329               | 0.226       | 0.774 | 0.717               | 0.248        | 0.752 | 0.703               | 0.216       | 0.785 | 0.388               | 0.215          | 0.785 | 0.448               |
|          |            |                      |                 | Controls | 0.204       | 0.796 |                     | 0.207        | 0.793 |                     | 0.213       | 0.787 |                     | 0.241       | 0.759 |                     | 0.234        | 0.766 |                     | 0.177       | 0.823 |                     | 0.185          | 0.815 |                     |
|          | rs9902118  | tag SNP              | C/T             | Cases    | 0.288       | 0.712 | 0.814               | 0.300        | 0.700 | 0.536               | 0.266       | 0.734 | 0.383               | 0.329       | 0.671 | 0.278               | 0.379        | 0.621 | 0.029               | 0.302       | 0.698 | 0.657               | 0.300          | 0.700 | 0.677               |
|          |            |                      | Controls        | 0.283    | 0.717       |       | 0.287               | 0.714        |       | 0.301               | 0.700       |       | 0.280               | 0.720       |       | 0.291               | 0.709        |       | 0.280               | 0.720       |       | 0.280               | 0.720          |       |                     |
|          | rs2333091  | tag SNP              | C/T             | Cases    | 0.138       | 0.862 | 0.796               | 0.146        | 0.854 | 0.804               | 0.148       | 0.852 | 0.986               | 0.130       | 0.870 | 0.791               | 0.170        | 0.830 | 0.138               | 0.129       | 0.871 | 0.596               | 0.123          | 0.877 | 0.612               |
|          |            |                      | Controls        | 0.143    | 0.857       |       | 0.142               | 0.858        |       | 0.149               | 0.851       |       | 0.121               | 0.879       |       | 0.124               | 0.876        |       | 0.151               | 0.849       |       | 0.143               | 0.857          |       |                     |
|          | rs2290990  | tag SNP              | G/T             | Cases    | 0.841       | 0.159 | 0.160               | 0.835        | 0.165 | 0.199               | 0.852       | 0.148 | 0.071               | 0.852       | 0.148 | 0.381               | 0.837        | 0.163 | 0.665               | 0.879       | 0.121 | 0.219               | 0.877          | 0.123 | 0.180               |
|          |            |                      | Controls        | 0.812    | 0.188       |       | 0.810               | 0.190        |       | 0.790               | 0.210       |       | 0.818               | 0.182       |       | 0.823               | 0.177        |       | 0.828               | 0.172       |       | 0.822               | 0.178          |       |                     |
|          | rs1020951  | tag SNP              | T/G             | Cases    | 0.311       | 0.689 | 0.588               | 0.319        | 0.681 | 0.394               | 0.313       | 0.687 | 0.499               | 0.247       | 0.753 | 0.583               | 0.279        | 0.721 | 0.951               | 0.263       | 0.737 | 0.176               | 0.281          | 0.719 | 0.460               |
|          |            |                      | Controls        | 0.298    | 0.702       |       | 0.300               | 0.700        |       | 0.338               | 0.662       |       | 0.271               | 0.729       |       | 0.277               | 0.723        |       | 0.335               | 0.665       |       | 0.318               | 0.682          |       |                     |
|          | rs7703522  | tag SNP              | T/C             | Cases    | 0.692       | 0.309 | 0.642               | 0.682        | 0.318 | 0.438               | 0.690       | 0.310 | 0.447               | 0.753       | 0.247 | 0.546               | 0.718        | 0.282 | 0.962               | 0.741       | 0.259 | 0.175               | 0.723          | 0.277 | 0.445               |
|          |            |                      | Controls        | 0.703    | 0.297       |       | 0.700               | 0.300        |       | 0.661               | 0.339       |       | 0.727               | 0.273       |       | 0.720               | 0.280        |       | 0.668               | 0.332       |       | 0.684               | 0.316          |       |                     |
|          | rs10040749 | tag SNP              | G/A             | Cases    | 0.311       | 0.689 | 0.626               | 0.321        | 0.679 | 0.386               | 0.313       | 0.687 | 0.391               | 0.247       | 0.754 | 0.546               | 0.282        | 0.718 | 0.911               | 0.259       | 0.741 | 0.148               | 0.277          | 0.723 | 0.407               |
|          |            |                      | Controls        | 0.300    | 0.700       |       | 0.301               | 0.699        |       | 0.347               | 0.654       |       | 0.274               | 0.726       |       | 0.278               | 0.722        |       | 0.336               | 0.664       |       | 0.320               | 0.681          |       |                     |
|          | rs7717321  | tag SNP              | T/C             | Cases    | 0.957       | 0.043 | 0.164               | 0.956        | 0.044 | 0.231               | 0.963       | 0.037 | 0.330               | 0.966       | 0.034 | 0.083               | 0.956        | 0.044 | 0.158               | 0.957       | 0.043 | 0.701               | 0.954          | 0.046 | 0.877               |
|          |            |                      | Controls        | 0.942    | 0.058       |       | 0.944               | 0.056        |       | 0.946               | 0.054       |       | 0.927               | 0.073       |       | 0.929               | 0.071        |       | 0.966               | 0.034       |       | 0.958               | 0.042          |       |                     |
|          | rs1560058  | non-synonymous (S/N) | T/C             | Cases    | 0.265       | 0.736 | 0.380               | 0.275        | 0.725 | 0.634               | 0.250       | 0.750 | 0.188               | 0.181       | 0.819 | 0.041               | 0.226        | 0.775 | 0.356               | 0.246       | 0.754 | 0.042               | 0.258          | 0.742 | 0.108               |
|          |            |                      | Controls        | 0.285    | 0.715       |       | 0.285               | 0.715        |       | 0.300               | 0.700       |       | 0.266               | 0.734       |       | 0.259               | 0.741        |       | 0.352               | 0.648       |       | 0.337               | 0.663          |       |                     |
|          | rs4958010  | tag SNP              | T/C             | Cases    | 0.253       | 0.747 | 0.848               | 0.259        | 0.741 | 0.979               | 0.238       | 0.762 | 0.297               | 0.167       | 0.833 | 0.090               | 0.211        | 0.789 | 0.438               | 0.224       | 0.776 | 0.080               | 0.231          | 0.769 | 0.151               |
|          |            |                      | Controls        | 0.257    | 0.743       |       | 0.260               | 0.740        |       | 0.277               | 0.723       |       | 0.238               | 0.762       |       | 0.239               | 0.761        |       | 0.315               | 0.685       |       | 0.300               | 0.700          |       |                     |
|          | rs7719346  | non-synonymous (H/Y) | G/A             | Cases    | 0.751       | 0.249 | 0.702               | 0.744        | 0.257 | 0.848               | 0.762       | 0.238 | 0.254               | 0.860       | 0.140 | 0.008               | 0.806        | 0.194 | 0.161               | 0.773       | 0.227 | 0.109               | 0.766          | 0.234 | 0.190               |
|          |            |                      | Controls        | 0.742    | 0.258       |       | 0.739               | 0.261        |       | 0.719               | 0.281       |       | 0.752               | 0.248       |       | 0.756               | 0.244        |       | 0.688               | 0.312       |       | 0.702               | 0.298          |       |                     |
|          | rs1863960  | tag SNP              | T/C             | Cases    | 0.276       | 0.724 | 0.409               | 0.284        | 0.716 | 0.529               | 0.257       | 0.743 | 0.172               | 0.185       | 0.815 | 0.048               | 0.233        | 0.767 | 0.304               | 0.250       | 0.750 | 0.042               | 0.262          | 0.739 | 0.107               |
|          |            |                      | Controls        | 0.296    | 0.704       |       | 0.299               | 0.701        |       | 0.310               | 0.690       |       | 0.271               | 0.730       |       | 0.272               | 0.728        |       | 0.357               | 0.643       |       | 0.342               | 0.658          |       |                     |
|          | rs13164349 | tag SNP              | G/A             | Cases    | 0.395       | 0.605 | 0.142               | 0.385        | 0.615 | 0.302               | 0.426       | 0.574 | 0.045               | 0.445       | 0.555 | 0.234               | 0.393        | 0.607 | 0.766               | 0.319       | 0.681 | 0.741               | 0.339          | 0.662 | 0.896               |
|          |            |                      | Controls        | 0.358    | 0.642       |       | 0.360               | 0.640        |       | 0.343               | 0.657       |       | 0.383               | 0.617       |       | 0.381               | 0.620        |       | 0.336               | 0.664       |       | 0.346               | 0.654          |       |                     |
|          | rs2303657  | tag SNP              | T/G             | Cases    | 0.002       | 0.998 | 0.724               | 0.002        | 0.998 | 0.727               | 0.000       | 1.000 | 0.512               | 0.000       | 1.000 | 1.000               | 0.005        | 0.995 | 0.168               | 0.000       | 1.000 | 0.515               | 0.000          | 1.000 | 0.516               |
|          |            |                      | Controls        | 0.001    | 0.999       |       | 0.001               | 0.999        |       | 0.002               | 0.998       |       | 0.000               | 1.000       |       | 0.000               | 1.000        |       | 0.004               | 0.996       |       | 0.004               | 0.996          |       |                     |
|          | rs890757   | non-synonymous (T/S) | G/C             | Cases    | 0.707       | 0.293 | 0.472               | 0.698        | 0.302 | 0.554               | 0.718       | 0.282 | 0.218               | 0.801       | 0.199 | 0.060               | 0.757        | 0.243 | 0.208               | 0.724       | 0.276 | 0.120               | 0.708          | 0.292 | 0.291               |
|          |            |                      | Controls        | 0.690    | 0.310       |       | 0.685               | 0.316        |       | 0.668               | 0.332       |       | 0.718               | 0.282       |       | 0.709               | 0.291        |       | 0.639               | 0.361       |       | 0.654               | 0.346          |       |                     |
|          | rs7722065  | tag SNP              | T/C             | Cases    | 0.255       | 0.745 | 0.854               | 0.260        | 0.740 | 0.877               | 0.245       | 0.755 | 0.893               | 0.301       | 0.699 | 0.147               | 0.301        | 0.699 | 0.080               | 0.336       | 0.664 | 0.087               | 0.315          | 0.685 | 0.156               |
|          |            |                      | Controls        | 0.260    | 0.740       |       | 0.257               | 0.743        |       | 0.250               | 0.750       |       | 0.235               | 0.766       |       | 0.234               | 0.766        |       | 0.244               | 0.756       |       | 0.244               | 0.756          |       |                     |
| EPB41L4A | rs6421836  | tag SNP              | T/C             | Cases    | 0.894       | 0.106 | 0.549               | 0.896        | 0.104 | 0.644               | 0.920       | 0.080 | 0.640               | 0.849       | 0.151 | 0.177               | 0.859        | 0.141 | 0.150               | 0.868       | 0.132 | 0.452               | 0.875          | 0.125 | 0.411               |
|          |            |                      | Controls        | 0.903    | 0.097       |       | 0.903               | 0.097        |       | 0.909               | 0.091       |       | 0.896               | 0.104       |       | 0.900               | 0.101        |       | 0.897               |             |       |                     |                |       |                     |

| Gene       | SNP rs #             | SNP type             | Alleles [A1/A2] | Group    | ANX core    |             |         | ANX extended |             |         | PD          |             |         | GAD core    |             |         | GAD extended |             |         | SOCPH core  |             |         | SOCPH extended |             |         |             |             |         |
|------------|----------------------|----------------------|-----------------|----------|-------------|-------------|---------|--------------|-------------|---------|-------------|-------------|---------|-------------|-------------|---------|--------------|-------------|---------|-------------|-------------|---------|----------------|-------------|---------|-------------|-------------|---------|
|            |                      |                      |                 |          | Allele freq | Allelic LRT | p-value | Allele freq  | Allelic LRT | p-value | Allele freq | Allelic LRT | p-value | Allele freq | Allelic LRT | p-value | Allele freq  | Allelic LRT | p-value | Allele freq | Allelic LRT | p-value | Allele freq    | Allelic LRT | p-value | Allele freq | Allelic LRT | p-value |
|            |                      |                      |                 |          | A1          | A2          |         | A1           | A2          |         | A1          | A2          |         | A1          | A2          |         | A1           | A2          |         | A1          | A2          |         | A1             | A2          |         | A1          | A2          |         |
| EPHX1      | rs12403480           | tag SNP              | C/T             | Cases    | 0.871       | 0.130       | 0.737   | 0.868        | 0.133       | 0.892   | 0.867       | 0.133       | 0.683   | 0.868       | 0.132       | 0.704   | 0.868        | 0.132       | 0.810   | 0.879       | 0.121       | 0.869   | 0.877          | 0.123       | 0.576   |             |             |         |
|            |                      |                      |                 | Controls | 0.876       | 0.124       |         | 0.870        | 0.130       |         | 0.878       | 0.122       |         | 0.881       | 0.119       |         | 0.874        | 0.126       |         | 0.873       | 0.127       |         | 0.856          | 0.144       |         |             |             |         |
|            | rs3766934            | tag SNP              | G/T             | Cases    | 0.917       | 0.083       | 0.647   | 0.915        | 0.085       | 0.895   | 0.915       | 0.085       | 0.627   | 0.897       | 0.103       | 0.252   | 0.898        | 0.102       | 0.511   | 0.912       | 0.088       | 0.870   | 0.914          | 0.086       | 0.837   |             |             |         |
|            |                      |                      |                 | Controls | 0.924       | 0.076       |         | 0.917        | 0.083       |         | 0.926       | 0.074       |         | 0.931       | 0.069       |         | 0.914        | 0.086       |         | 0.918       | 0.082       |         | 0.908          | 0.092       |         |             |             |         |
|            | rs2234698            | tag SNP              | C/T             | Cases    | 0.002       | 0.998       | 0.052   | 0.003        | 0.997       | 0.089   | 0.005       | 0.995       | 0.409   | 0.000       | 1.000       | 0.333   | 0.005        | 0.995       | 0.593   | 0.000       | 0.999       | 0.826   | 0.008          | 0.992       | 0.833   |             |             |         |
|            |                      |                      |                 | Controls | 0.010       | 0.990       |         | 0.010        | 0.990       |         | 0.012       | 0.988       |         | 0.007       | 0.993       |         | 0.010        | 0.990       |         | 0.013       | 0.987       |         | 0.011          | 0.989       |         |             |             |         |
|            | rs1051740            | non-synonymous (Y/H) | C/T             | Cases    | 0.266       | 0.734       | 0.086   | 0.276        | 0.724       | 0.153   | 0.278       | 0.722       | 0.695   | 0.336       | 0.664       | 0.439   | 0.345        | 0.655       | 0.223   | 0.360       | 0.640       | 0.920   | 0.336          | 0.664       | 0.735   |             |             |         |
|            |                      |                      |                 | Controls | 0.308       | 0.692       |         | 0.308        | 0.692       |         | 0.294       | 0.706       |         | 0.299       | 0.701       |         | 0.297        | 0.703       |         | 0.353       | 0.647       |         | 0.354          | 0.646       |         |             |             |         |
|            | rs2234922            | non-synonymous (H/R) | A/G             | Cases    | 0.847       | 0.153       | 0.293   | 0.854        | 0.146       | 0.163   | 0.830       | 0.170       | 0.988   | 0.849       | 0.151       | 0.244   | 0.868        | 0.132       | 0.116   | 0.857       | 0.143       | 0.792   | 0.849          | 0.151       | 0.809   |             |             |         |
|            |                      |                      |                 | Controls | 0.827       | 0.173       |         | 0.829        | 0.171       |         | 0.830       | 0.171       |         | 0.805       | 0.195       |         | 0.818        | 0.182       |         | 0.846       | 0.154       |         | 0.859          | 0.141       |         |             |             |         |
| rs2292568  | tag SNP              | C/T                  | Cases           | 0.909    | 0.091       | 0.149       | 0.908   | 0.092        | 0.161       | 0.907   | 0.093       | 0.791       | 0.925   | 0.075       | 0.709       | 0.918   | 0.083        | 0.767       | 0.897   | 0.103       | 0.175       | 0.900   | 0.100          | 0.196       |         |             |             |         |
|            |                      |                      | Controls        | 0.929    | 0.071       |             | 0.926   | 0.074        |             | 0.913   | 0.087       |             | 0.935   | 0.066       |             | 0.924   | 0.076        |             | 0.937   | 0.063       |             | 0.936   | 0.064          |             |         |             |             |         |
| rs1051741  | tag SNP              | C/T                  | Cases           | 0.940    | 0.060       | 0.710       | 0.944   | 0.056        | 0.419       | 0.935   | 0.065       | 0.915       | 0.966   | 0.034       | 0.043       | 0.966   | 0.034        | 0.047       | 0.948   | 0.052       | 0.970       | 0.946   | 0.054          | 0.845       |         |             |             |         |
|            |                      |                      | Controls        | 0.935    | 0.065       |             | 0.935   | 0.065        |             | 0.933   | 0.067       |             | 0.916   | 0.084       |             | 0.928   | 0.072        |             | 0.950   | 0.050       |             | 0.951   | 0.049          |             |         |             |             |         |
| rs360063   | tag SNP              | A/G                  | Cases           | 0.438    | 0.563       | 0.506       | 0.448   | 0.552        | 0.779       | 0.397   | 0.603       | 0.492       | 0.480   | 0.521       | 0.610       | 0.485   | 0.515        | 0.499       | 0.395   | 0.605       | 0.079       | 0.414   | 0.586          | 0.137       |         |             |             |         |
|            |                      |                      | Controls        | 0.455    | 0.545       |             | 0.455   | 0.545        |             | 0.427   | 0.573       |             | 0.452   | 0.548       |             | 0.456   | 0.544        |             | 0.487   | 0.511       |             | 0.487   | 0.511          |             |         |             |             |         |
| rs1937778  | tag SNP              | C/G                  | Cases           | 0.648    | 0.352       | 0.122       | 0.647   | 0.353        | 0.098       | 0.609   | 0.392       | 0.605       | 0.616   | 0.384       | 0.751       | 0.641   | 0.359        | 0.406       | 0.707   | 0.293       | 0.128       | 0.715   | 0.285          | 0.104       |         |             |             |         |
|            |                      |                      | Controls        | 0.611    | 0.390       |             | 0.609   | 0.391        |             | 0.630   | 0.370       |             | 0.632   | 0.368       |             | 0.606   | 0.394        |             | 0.624   | 0.376       |             | 0.634   | 0.366          |             |         |             |             |         |
| rs1937780  | tag SNP              | C/T                  | Cases           | 0.649    | 0.351       | 0.166       | 0.647   | 0.353        | 0.143       | 0.606   | 0.394       | 0.477       | 0.627   | 0.373       | 0.836       | 0.645   | 0.355        | 0.386       | 0.705   | 0.295       | 0.129       | 0.714   | 0.286          | 0.106       |         |             |             |         |
|            |                      |                      | Controls        | 0.614    | 0.386       |             | 0.612   | 0.388        |             | 0.635   | 0.365       |             | 0.637   | 0.363       |             | 0.609   | 0.391        |             | 0.622   | 0.378       |             | 0.632   | 0.368          |             |         |             |             |         |
| rs13215896 | tag SNP              | T/C                  | Cases           | 0.933    | 0.067       | 0.879       | 0.933   | 0.067        | 0.772       | 0.935   | 0.065       | 0.632       | 0.944   | 0.056       | 0.445       | 0.946   | 0.054        | 0.101       | 0.936   | 0.064       | 0.877       | 0.944   | 0.056          | 0.891       |         |             |             |         |
|            |                      |                      | Controls        | 0.935    | 0.065       |             | 0.929   | 0.071        |             | 0.924   | 0.076       |             | 0.925   | 0.075       |             | 0.910   | 0.090        |             | 0.941   | 0.059       |             | 0.947   | 0.053          |             |         |             |             |         |
| rs10484854 | tag SNP              | A/G                  | Cases           | 0.190    | 0.810       | 0.042       | 0.193   | 0.807        | 0.054       | 0.215   | 0.785       | 0.413       | 0.226   | 0.774       | 0.939       | 0.209   | 0.791        | 0.543       | 0.164   | 0.836       | 0.167       | 0.172   | 0.828          | 0.203       |         |             |             |         |
|            |                      |                      | Controls        | 0.233    | 0.767       |             | 0.231   | 0.770        |             | 0.188   | 0.812       |             | 0.230   | 0.771       |             | 0.231   | 0.769        |             | 0.229   | 0.771       |             | 0.229   | 0.771          |             |         |             |             |         |
| rs9394524  | tag SNP              | T/G                  | Cases           | 0.913    | 0.087       | 0.854       | 0.912   | 0.088        | 0.944       | 0.911   | 0.089       | 0.829       | 0.938   | 0.063       | 0.277       | 0.931   | 0.069        | 0.128       | 0.891   | 0.109       | 0.388       | 0.903   | 0.097          | 0.408       |         |             |             |         |
|            |                      |                      | Controls        | 0.915    | 0.085       |             | 0.912   | 0.088        |             | 0.906   | 0.094       |             | 0.908   | 0.092       |             | 0.895   | 0.105        |             | 0.919   | 0.081       |             | 0.928   | 0.073          |             |         |             |             |         |
| rs6932648  | tag SNP              | T/C                  | Cases           | 0.088    | 0.912       | 0.710       | 0.088   | 0.912        | 0.920       | 0.086   | 0.914       | 0.801       | 0.063   | 0.937       | 0.307       | 0.069   | 0.931        | 0.141       | 0.096   | 0.904       | 0.607       | 0.086   | 0.914          | 0.602       |         |             |             |         |
|            |                      |                      | Controls        | 0.082    | 0.918       |             | 0.086   | 0.914        |             | 0.092   | 0.908       |             | 0.092   | 0.909       |             | 0.104   | 0.896        |             | 0.080   | 0.920       |             | 0.071   | 0.929          |             |         |             |             |         |
| rs9394523  | tag SNP              | T/C                  | Cases           | 0.090    | 0.910       | 0.771       | 0.090   | 0.910        | 0.961       | 0.089   | 0.911       | 0.788       | 0.063   | 0.938       | 0.252       | 0.069   | 0.931        | 0.124       | 0.103   | 0.897       | 0.480       | 0.092   | 0.908          | 0.482       |         |             |             |         |
|            |                      |                      | Controls        | 0.085    | 0.915       |             | 0.089   | 0.911        |             | 0.095   | 0.905       |             | 0.093   | 0.907       |             | 0.105   | 0.895        |             | 0.081   | 0.919       |             | 0.073   | 0.928          |             |         |             |             |         |
| rs10947755 | tag SNP              | T/C                  | Cases           | 0.576    | 0.424       | 0.024       | 0.576   | 0.424        | 0.027       | 0.574   | 0.426       | 0.553       | 0.548   | 0.452       | 0.383       | 0.583   | 0.418        | 0.096       | 0.526   | 0.474       | 0.755       | 0.539   | 0.462          | 0.765       |         |             |             |         |
|            |                      |                      | Controls        | 0.519    | 0.481       |             | 0.525   | 0.476        |             | 0.551   | 0.450       |             | 0.503   | 0.497       |             | 0.512   | 0.488        |             | 0.508   | 0.492       |             | 0.523   | 0.477          |             |         |             |             |         |
| rs2736654  | non-synonymous (E/A) | A/C                  | Cases           | 0.667    | 0.333       | 0.012       | 0.667   | 0.333        | 0.021       | 0.659   | 0.341       | 0.758       | 0.611   | 0.389       | 0.819       | 0.652   | 0.348        | 0.422       | 0.629   | 0.371       | 0.563       | 0.631   | 0.369          | 0.586       |         |             |             |         |
|            |                      |                      | Controls        | 0.605    | 0.395       |             | 0.614   | 0.386        |             | 0.647   | 0.354       |             | 0.600   | 0.400       |             | 0.620   | 0.381        |             | 0.598   | 0.402       |             | 0.603   | 0.397          |             |         |             |             |         |
| rs12214815 | tag SNP              | G/C                  | Cases           | 0.688    | 0.312       | 0.033       | 0.689   | 0.311        | 0.061       | 0.694   | 0.306       | 0.738       | 0.625   | 0.375       | 0.989       | 0.657   | 0.343        | 0.709       | 0.681   | 0.319       | 0.317       | 0.677   | 0.323          | 0.337       |         |             |             |         |
|            |                      |                      | Controls        | 0.638    | 0.362       |             | 0.646   | 0.354        |             | 0.682   | 0.318       |             | 0.624   | 0.376       |             | 0.642   | 0.359        |             | 0.627   | 0.373       |             | 0.629   | 0.371          |             |         |             |             |         |
| rs937662   | tag SNP              | A/G                  | Cases           | 0.328    | 0.672       | 0.023       | 0.328   | 0.672        | 0.045       | 0.319   | 0.681       | 0.574       | 0.384   | 0.616       | 0.797       | 0.358   | 0.642        | 0.651       | 0.357   | 0.643       | 0.541       | 0.357   | 0.643          | 0.559       |         |             |             |         |
|            |                      |                      | Controls        | 0.384    | 0.616       |             | 0.373   | 0.627        |             | 0.341   | 0.659       |             | 0.397   | 0.603       |             | 0.376   | 0.624        |             | 0.391   | 0.609       |             | 0.388   | 0.612          |             |         |             |             |         |
| rs7604     | tag SNP              | A/G                  | Cases           | 0.066    | 0.934       | 0.865       | 0.064   | 0.936        | 0.443       | 0.061   | 0.939       | 0.459       | 0.056   | 0.944       | 0.374       | 0.049   | 0.951        | 0.051       | 0.052   | 0.948       | 0.662       | 0.046   | 0.954          | 0.548       |         |             |             |         |
|            |                      |                      | Controls        | 0.069    | 0.932       |             | 0.074   | 0.926        |             | 0.077   | 0.923       |             | 0.079   | 0.921       |             | 0.093   | 0.907        |             | 0.064   | 0.936       |             | 0.061   | 0.939          |             |         |             |             |         |
| rs10283288 | tag SNP              | T/A                  | Cases           | 0.057    | 0.943       | 0.099       | 0.058   | 0.942        | 0.047       | 0.074   | 0.926       | 0.653       | 0.027   | 0.973       | 0.032       | 0.039   | 0.961        | 0.021       | 0.052   | 0.948       | 0.628       | 0.062   | 0.939          | 0.590       |         |             |             |         |
|            |                      |                      | Controls        | 0.078    | 0.922       |             | 0.083   | 0.917        |             | 0.084   | 0.916       |             | 0.076   | 0.924       |             | 0.090   | 0.910        |             | 0.065   | 0.935       |             | 0.077   | 0.923          |             |         |             |             |         |
| rs2911678  | tag SNP              | A/T                  | Cases           | 0.775    | 0.225       | 0.762       | 0.772   | 0.228        | 0.574       | 0.762   | 0.238       | 0.582       | 0.773   | 0.227       | 0.774       | 0.774   | 0.226        | 0.422       | 0.720   | 0.280       | 0.396       | 0.705   | 0.295          | 0.324       |         |             |             |         |
|            |                      |                      | Controls        | 0.769    | 0.231       |             | 0.760   | 0.240        |             | 0.782   | 0.218       |             | 0.761   | 0.239       |             | 0.743   | 0.257        |             | 0.764   | 0.236       |             | 0.757   | 0.244          |             |         |             |             |         |
| rs2253409  | tag SNP              | C/G                  | Cases           | 0.201    | 0.799       | 0.491       | 0.205   | 0.795        | 0.368       | 0.204   | 0.796       | 0.956       | 0.192   | 0.808       | 0.460       | 0.199   | 0.801        | 0.265       | 0.241   | 0.759       | 0.587       | 0.254   | 0.746          | 0.503       |         |             |             |         |
|            |                      |                      | Controls        | 0.215    | 0.785       |             | 0.223   | 0.777        |             | 0.202   | 0.798       |             | 0.221   | 0.779       |             | 0.239   | 0.761        |             | 0.216   | 0.785       |             | 0.223   | 0.777          |             |         |             |             |         |
| rs8190996  | tag SNP              | C/T                  | Cases           | 0.449    | 0.551       | 0.589       | 0.457   | 0.543        | 0.572       | 0.426   | 0.574       | 0.896       | 0.478   | 0.522       | 0.465       | 0.490   | 0.510        | 0.478       | 0.518   | 0.482       | 0.372       | 0.532   | 0.468          | 0.198       |         |             |             |         |
|            |                      |                      | Controls        | 0.435    | 0.565       |             | 0.443   | 0.557        |             | 0.420   | 0.580       |             | 0.438   | 0.562       |             | 0.457   | 0.543        |             | 0.464   | 0.536       |             | 0.459   | 0.541          |             |         |             |             |         |

| Gene       | SNP rs #   | SNP type                    | Alleles [A1/A2] | Group    | ANX core    |       |                     | ANX extended |       |                     | PD          |              |                     | GAD core    |       |                     | GAD extended |              |                     | SOCPH core  |       |                     | SOCPH extended |       |                     |
|------------|------------|-----------------------------|-----------------|----------|-------------|-------|---------------------|--------------|-------|---------------------|-------------|--------------|---------------------|-------------|-------|---------------------|--------------|--------------|---------------------|-------------|-------|---------------------|----------------|-------|---------------------|
|            |            |                             |                 |          | Allele freq |       | Allelic LRT p-value | Allele freq  |       | Allelic LRT p-value | Allele freq |              | Allelic LRT p-value | Allele freq |       | Allelic LRT p-value | Allele freq  |              | Allelic LRT p-value | Allele freq |       | Allelic LRT p-value | Allele freq    |       | Allelic LRT p-value |
|            |            |                             |                 |          | A1          | A2    |                     | A1           | A2    |                     | A1          | A2           |                     | A1          | A2    |                     | A1           | A2           |                     | A1          | A2    |                     | A1             | A2    |                     |
| PSAP       | rs1054635  | polymorphic miR target site | G/A             | Cases    | 0.900       | 0.100 | 0.223               | 0.906        | 0.094 | 0.118               | 0.893       | 0.108        | 0.392               | 0.918       | 0.082 | 0.154               | 0.927        | 0.074        | 0.058               | 0.909       | 0.091 | 0.252               | 0.903          | 0.097 | 0.464               |
|            |            |                             |                 | Controls | 0.881       | 0.119 |                     | 0.883        | 0.117 |                     | 0.869       | 0.131        |                     | 0.873       | 0.127 |                     | 0.878        | 0.122        |                     | 0.869       | 0.131 |                     | 0.879          | 0.121 |                     |
|            | rs7869     | tag SNP                     | A/G             | Cases    | 0.339       | 0.661 | 0.928               | 0.337        | 0.663 | 0.979               | 0.381       | 0.619        | 0.719               | 0.329       | 0.671 | 0.985               | 0.314        | 0.686        | 0.849               | 0.362       | 0.638 | 0.979               | 0.354          | 0.646 | 0.720               |
|            |            |                             |                 | Controls | 0.341       | 0.659 |                     | 0.336        | 0.664 |                     | 0.366       | 0.634        |                     | 0.328       | 0.673 |                     | 0.322        | 0.678        |                     | 0.360       | 0.640 |                     | 0.333          | 0.667 |                     |
|            | rs885828   | tag SNP                     | C/T             | Cases    | 0.659       | 0.341 | 0.978               | 0.659        | 0.341 | 0.909               | 0.612       | 0.388        | 0.583               | 0.612       | 0.329 | 0.959               | 0.686        | 0.314        | 0.758               | 0.640       | 0.360 | 0.932               | 0.648          | 0.352 | 0.791               |
|            |            |                             |                 | Controls | 0.658       | 0.342 |                     | 0.662        | 0.339 |                     | 0.634       | 0.366        |                     | 0.674       | 0.326 |                     | 0.674        | 0.326        |                     | 0.636       | 0.364 |                     | 0.663          | 0.337 |                     |
|            | rs2070968  | tag SNP                     | A/T             | Cases    | 0.243       | 0.757 | 0.396               | 0.250        | 0.750 | 0.184               | 0.280       | 0.720        | 0.299               | 0.247       | 0.753 | 0.290               | 0.245        | 0.755        | 0.239               | 0.272       | 0.728 | 0.407               | 0.258          | 0.742 | 0.335               |
|            |            |                             |                 | Controls | 0.224       | 0.776 |                     | 0.223        | 0.777 |                     | 0.241       | 0.759        |                     | 0.201       | 0.799 |                     | 0.203        | 0.797        |                     | 0.229       | 0.771 |                     | 0.212          | 0.788 |                     |
|            | rs1015193  | tag SNP                     | A/G             | Cases    | 0.595       | 0.405 | 0.710               | 0.588        | 0.412 | 0.874               | 0.614       | 0.386        | 0.618               | 0.582       | 0.418 | 0.889               | 0.568        | 0.432        | 0.859               | 0.603       | 0.397 | 0.862               | 0.592          | 0.408 | 0.813               |
|            |            |                             |                 | Controls | 0.585       | 0.415 |                     | 0.584        | 0.416 |                     | 0.594       | 0.406        |                     | 0.589       | 0.411 |                     | 0.575        | 0.425        |                     | 0.613       | 0.387 |                     | 0.605          | 0.395 |                     |
|            | rs3819341  | tag SNP                     | C/G             | Cases    | 0.757       | 0.243 | 0.395               | 0.750        | 0.250 | 0.185               | 0.720       | 0.280        | 0.291               | 0.753       | 0.247 | 0.289               | 0.755        | 0.245        | 0.233               | 0.728       | 0.272 | 0.401               | 0.742          | 0.258 | 0.335               |
|            |            |                             |                 | Controls | 0.776       | 0.224 |                     | 0.777        | 0.223 |                     | 0.759       | 0.241        |                     | 0.799       | 0.201 |                     | 0.797        | 0.203        |                     | 0.771       | 0.229 |                     | 0.788          | 0.212 |                     |
|            | rs10740391 | tag SNP                     | T/C             | Cases    | 0.655       | 0.345 | 0.472               | 0.650        | 0.350 | 0.748               | 0.650       | 0.351        | 0.697               | 0.681       | 0.319 | 0.277               | 0.652        | 0.348        | 0.920               | 0.638       | 0.362 | 0.430               | 0.654          | 0.346 | 0.407               |
|            |            |                             |                 | Controls | 0.637       | 0.364 |                     | 0.643        | 0.358 |                     | 0.634       | 0.366        |                     | 0.626       | 0.374 |                     | 0.648        | 0.352        |                     | 0.683       | 0.317 |                     | 0.698          | 0.302 |                     |
|            | rs11000020 | tag SNP                     | G/A             | Cases    | 0.945       | 0.055 | 0.956               | 0.947        | 0.053 | 0.871               | 0.963       | 0.037        | 0.091               | 0.945       | 0.055 | 0.847               | 0.942        | 0.058        | 0.663               | 0.966       | 0.034 | 0.396               | 0.969          | 0.031 | 0.401               |
|            |            |                             | Controls        | 0.946    | 0.054       |       | 0.949               | 0.051        |       | 0.931               | 0.069       |              | 0.940               | 0.060       |       | 0.950               | 0.050        |              | 0.945               | 0.055       |       | 0.951               | 0.049          |       |                     |
| rs762571   | tag SNP    | C/T                         | Cases           | 0.392    | 0.609       | 0.552 | 0.388               | 0.613        | 0.297 | 0.421               | 0.579       | 0.856        | 0.363               | 0.637       | 0.176 | 0.359               | 0.641        | 0.116        | 0.414               | 0.586       | 0.647 | 0.415               | 0.585          | 0.669 |                     |
|            |            |                             | Controls        | 0.406    | 0.594       |       | 0.412               | 0.588        |       | 0.413               | 0.587       |              | 0.430               | 0.570       |       | 0.424               | 0.576        |              | 0.390               | 0.610       |       | 0.394               | 0.606          |       |                     |
| rs4747204  | tag SNP    | G/A                         | Cases           | 0.774    | 0.226       | 0.455 | 0.780               | 0.220        | 0.739 | 0.780               | 0.220       | 0.659        | 0.781               | 0.219       | 0.678 | 0.782               | 0.218        | 0.836        | 0.776               | 0.224       | 0.908 | 0.769               | 0.231          | 0.953 |                     |
|            |            |                             | Controls        | 0.790    | 0.210       |       | 0.786               | 0.214        |       | 0.796               | 0.204       |              | 0.764               | 0.236       |       | 0.774               | 0.226        |              | 0.782               | 0.219       |       | 0.767               | 0.233          |       |                     |
| rs4747209  | tag SNP    | T/C                         | Cases           | 0.635    | 0.365       | 0.592 | 0.637               | 0.363        | 0.388 | 0.608               | 0.393       | 0.819        | 0.651               | 0.349       | 0.294 | 0.652               | 0.348        | 0.242        | 0.595               | 0.405       | 0.620 | 0.594               | 0.406          | 0.549 |                     |
|            |            |                             | Controls        | 0.622    | 0.378       |       | 0.617               | 0.383        |       | 0.617               | 0.383       |              | 0.601               | 0.399       |       | 0.603               | 0.397        |              | 0.622               | 0.378       |       | 0.624               | 0.376          |       |                     |
| rs7092990  | tag SNP    | T/C                         | Cases           | 0.094    | 0.906       | 0.058 | 0.093               | 0.907        | 0.106 | 0.074               | 0.926       | 0.981        | 0.103               | 0.897       | 0.117 | 0.107               | 0.893        | 0.127        | 0.086               | 0.914       | 0.503 | 0.092               | 0.908          | 0.463 |                     |
|            |            |                             | Controls        | 0.068    | 0.932       |       | 0.072               | 0.928        |       | 0.073               | 0.927       |              | 0.059               | 0.941       |       | 0.069               | 0.931        |              | 0.067               | 0.933       |       | 0.071               | 0.929          |       |                     |
| rs4746097  | tag SNP    | T/C                         | Cases           | 0.304    | 0.696       | 0.279 | 0.291               | 0.709        | 0.065 | 0.271               | 0.729       | <b>0.004</b> | 0.315               | 0.685       | 0.805 | 0.294               | 0.706        | 0.328        | 0.298               | 0.702       | 0.501 | 0.305               | 0.695          | 0.526 |                     |
|            |            |                             | Controls        | 0.330    | 0.671       |       | 0.332               | 0.669        |       | 0.384               | 0.616       |              | 0.326               | 0.674       |       | 0.331               | 0.669        |              | 0.335               | 0.665       |       | 0.337               | 0.663          |       |                     |
| rs11597008 | tag SNP    | T/C                         | Cases           | 0.403    | 0.597       | 0.090 | 0.388               | 0.612        | 0.014 | 0.385               | 0.615       | <b>0.008</b> | 0.417               | 0.583       | 0.258 | 0.392               | 0.608        | 0.076        | 0.411               | 0.589       | 0.236 | 0.421               | 0.579          | 0.231 |                     |
|            |            |                             | Controls        | 0.447    | 0.553       |       | 0.447               | 0.553        |       | 0.498               | 0.502       |              | 0.472               | 0.528       |       | 0.465               | 0.535        |              | 0.479               | 0.521       |       | 0.485               | 0.515          |       |                     |
| rs4747211  | tag SNP    | C/T                         | Cases           | 0.103    | 0.897       | 0.355 | 0.100               | 0.900        | 0.277 | 0.116               | 0.884       | 0.885        | 0.103               | 0.897       | 0.167 | 0.097               | 0.903        | 0.187        | 0.121               | 0.879       | 0.643 | 0.123               | 0.877          | 0.599 |                     |
|            |            |                             | Controls        | 0.118    | 0.882       |       | 0.116               | 0.884        |       | 0.112               | 0.888       |              | 0.148               | 0.852       |       | 0.132               | 0.868        |              | 0.138               | 0.862       |       | 0.142               | 0.858          |       |                     |
| rs908829   | tag SNP    | G/C                         | Cases           | 0.593    | 0.407       | 0.398 | 0.577               | 0.423        | 0.654 | 0.590               | 0.410       | 0.563        | 0.590               | 0.410       | 0.964 | 0.559               | 0.441        | 0.849        | 0.580               | 0.420       | 0.650 | 0.579               | 0.421          | 0.577 |                     |
|            |            |                             | Controls        | 0.572    | 0.428       |       | 0.566               | 0.434        |       | 0.567               | 0.434       |              | 0.580               | 0.413       |       | 0.567               | 0.434        |              | 0.555               | 0.445       |       | 0.549               | 0.451          |       |                     |
| rs11790360 | tag SNP    | G/T                         | Cases           | 0.599    | 0.401       | 0.312 | 0.583               | 0.417        | 0.601 | 0.602               | 0.398       | 0.409        | 0.596               | 0.404       | 0.984 | 0.563               | 0.437        | 0.699        | 0.586               | 0.414       | 0.630 | 0.585               | 0.415          | 0.557 |                     |
|            |            |                             | Controls        | 0.574    | 0.426       |       | 0.570               | 0.430        |       | 0.569               | 0.431       |              | 0.594               | 0.406       |       | 0.579               | 0.421        |              | 0.559               | 0.441       |       | 0.553               | 0.447          |       |                     |
| rs3814499  | tag SNP    | A/G                         | Cases           | 0.670    | 0.330       | 0.102 | 0.669               | 0.331        | 0.102 | 0.710               | 0.290       | 0.724        | 0.651               | 0.349       | 0.054 | 0.665               | 0.335        | 0.152        | 0.664               | 0.336       | 0.078 | 0.654               | 0.346          | 0.040 |                     |
|            |            |                             | Controls        | 0.709    | 0.292       |       | 0.707               | 0.294        |       | 0.697               | 0.303       |              | 0.741               | 0.259       |       | 0.722               | 0.278        |              | 0.754               | 0.246       |       | 0.754               | 0.246          |       |                     |
| rs4880179  | tag SNP    | A/G                         | Cases           | 0.034    | 0.966       | 0.355 | 0.039               | 0.961        | 0.146 | 0.019               | 0.982       | 0.883        | 0.041               | 0.959       | 0.070 | 0.053               | 0.947        | <b>0.010</b> | 0.026               | 0.974       | 0.661 | 0.031               | 0.969          | 0.402 |                     |
|            |            |                             | Controls        | 0.025    | 0.975       |       | 0.026               | 0.974        |       | 0.021               | 0.979       |              | 0.010               | 0.990       |       | 0.015               | 0.985        |              | 0.017               | 0.983       |       | 0.015               | 0.985          |       |                     |
| rs6926     | tag SNP    | T/G                         | Cases           | 0.326    | 0.674       | 0.186 | 0.327               | 0.673        | 0.165 | 0.287               | 0.713       | 0.561        | 0.349               | 0.651       | 0.065 | 0.335               | 0.665        | 0.172        | 0.328               | 0.672       | 0.117 | 0.339               | 0.662          | 0.062 |                     |
|            |            |                             | Controls        | 0.294    | 0.706       |       | 0.295               | 0.705        |       | 0.310               | 0.690       |              | 0.262               | 0.738       |       | 0.281               | 0.720        |              | 0.248               | 0.752       |       | 0.248               | 0.752          |       |                     |
| rs17578859 | tag SNP    | A/G                         | Cases           | 0.294    | 0.706       | 0.265 | 0.289               | 0.711        | 0.323 | 0.266               | 0.734       | 0.534        | 0.308               | 0.692       | 0.191 | 0.282               | 0.718        | 0.645        | 0.302               | 0.698       | 0.158 | 0.308               | 0.698          | 0.115 |                     |
|            |            |                             | Controls        | 0.268    | 0.732       |       | 0.268               | 0.732        |       | 0.289               | 0.711       |              | 0.250               | 0.750       |       | 0.265               | 0.735        |              | 0.231               | 0.769       |       | 0.233               | 0.767          |       |                     |
| rs2999526  | tag SNP    | G/A                         | Cases           | 0.349    | 0.651       | 0.376 | 0.349               | 0.651        | 0.335 | 0.363               | 0.637       | 0.556        | 0.336               | 0.664       | 0.850 | 0.350               | 0.651        | 0.965        | 0.377               | 0.623       | 0.786 | 0.359               | 0.641          | 0.485 |                     |
|            |            |                             | Controls        | 0.371    | 0.629       |       | 0.371               | 0.629        |       | 0.387               | 0.613       |              | 0.326               | 0.674       |       | 0.348               | 0.652        |              | 0.392               | 0.608       |       | 0.396               | 0.604          |       |                     |
| rs2338018  | tag SNP    | T/C                         | Cases           | 0.093    | 0.907       | 0.767 | 0.089               | 0.911        | 0.859 | 0.083               | 0.917       | 0.308        | 0.089               | 0.911       | 0.746 | 0.087               | 0.913        | 0.485        | 0.103               | 0.897       | 0.984 | 0.100               | 0.900          | 0.806 |                     |
|            |            |                             | Controls        | 0.098    | 0.902       |       | 0.092               | 0.908        |       | 0.110               | 0.890       |              | 0.079               | 0.921       |       | 0.071               | 0.929        |              | 0.105               | 0.895       |       | 0.109               | 0.891          |       |                     |
| rs12083193 | tag SNP    | G/C                         | Cases           | 0.756    | 0.244       | 0.729 | 0.753               | 0.247        | 0.598 | 0.743               | 0.257       | 0.847        | 0.767               | 0.233       | 0.938 | 0.752               | 0.248        | 0.644        | 0.741               | 0.259       | 0.769 | 0.754               | 0.246          | 0.518 |                     |
|            |            |                             | Controls        | 0.749    | 0.251       |       | 0.742               | 0.258        |       | 0.750               | 0.250       |              | 0.764               | 0.236       |       | 0.735               | 0.265        |              | 0.727               | 0.273       |       | 0.726               | 0.274          |       |                     |
| rs8100085  | tag SNP    | A/T                         | Cases           | 0.387    | 0.613       | 0     |                     |              |       |                     |             |              |                     |             |       |                     |              |              |                     |             |       |                     |                |       |                     |
